# Supplementary material for: Predominantly Orphan Secretome in the Lung Pathogen Mycobacterium abscessus Revealed by a Multipronged Growth-Phase-Driven Strategy
Source: MDPI journal article supplement (doi:10.3390/microorganisms12020378), 2024-02-12
Supplement: s1 [file s1]

<sup>1</sup> Pulmonary/Microbial Pathogenesis Laboratory, Department of Environmental and Public Health Sciences, University of Cincinnati College of Medicine, Cincinnati, OH 45267, USA; chandrrh@ucmail.uc.edu (H.C.)

<sup>2</sup> Vermont Biomedical Research Network Proteomics Facility, University of Vermont, Burlington, VT 05405, USA

\* Correspondence: jagjit.yadav@uc.edu; Tel.: +1-513-558-4806

SUPPLEMENTARY INFORMATION

Table S1: Annotated secreted proteins of *M. abscessus* predicted in silico.

| Serial # | Protein ID | Protein name                                                                                    |          | Locus name | Gene symbol | Molecular function                              | Biological Function                                    |                    |     |
|----------|------------|-------------------------------------------------------------------------------------------------|----------|------------|-------------|-------------------------------------------------|--------------------------------------------------------|--------------------|-----|
| 1        | B1MEL2     | Antigen precursor                                                                               | 85-A     | MAB_0176   | fbpA        | Mycolyltransferase                              | Cell wall biogenesis                                   |                    |     |
| 2        | B1MEL3     | Antigen precursor                                                                               | 85-A/B/C | MAB_0177   | fbpA        | Mycolyltransferase                              | Cell wall biogenesis                                   |                    |     |
| 3        | B1MMV2     | Antigen precursor                                                                               | 85-B     | MAB_1579   | fbpA        | Mycolyltransferase                              | Cell wall biogenesis                                   |                    |     |
| 4        | B1MEL1     | Antigen precursor                                                                               | 85-C     | MAB_0175   | -           | Mycolyltransferase                              | Cell wall biogenesis                                   |                    |     |
| 5        | B1MFV7     | Probable bifunctional membrane-associated penicillin-binding protein PonA2/glycosyl transferase |          | MAB_0408c  | ponA2       | Glycosyltransferase<br>Hydrolase<br>Transferase | Cell wall biogenesis /degradation                      |                    |     |
| 6        | B1MP31     | Probable penicillin-binding membrane protein PbpB                                               |          | MAB_2000   | pbpB        | Hydrolase                                       | Antibiotic resistance/cell wall biogenesis/degradation |                    |     |
| 7        | B1MEK4     | Putative N-acetylmuramoyl-L-alanine amidase                                                     |          | MAB_0168c  | -           | Protein binding                                 | Peptidoglycan process                                  | catabolic          |     |
| 8        | B1MKI9     | Conserved hypothetical protein (lipolytic enzyme G-D-S-L?)                                      |          | MAB_1193c  | -           | Hydrolase                                       | Lipid metabolic process                                |                    |     |
| 9        | B1MGX0     | Probable hemolytic phospholipase C                                                              | non-     | MAB_0555   | -           | Hydrolase                                       | Lipid catabolic process                                |                    |     |
| 10       | B1MMD5     | Phosphate transporter, periplasmic protein                                                      | ABC      | MAB_4852c  | pstS3       | Inorganic phosphate transporter activity        | Phosphate Stress Transport                             | transport response |     |
| 11       | B1MDZ7     | Probable FeIII-dicitrate-binding periplasmic lipoprotein                                        |          | MAB_3390   | fecB        | Iron ion transmembrane transporter activity     | High-affinity transport                                | iron               | ion |
| 12       | B1MHE3     | Probable low-affinity inorganic phosphate transporter                                           |          | MAB_3950c  | pitA        | Transporter activity                            | Phosphate transport                                    |                    |     |

|    |        |                                                                |           |      |                                                      |                                     |
|----|--------|----------------------------------------------------------------|-----------|------|------------------------------------------------------|-------------------------------------|
| 13 | B1MC95 | Probable molybdenum ABC transporter, periplasmic               | MAB_2787c | -    | Molybdate transmembrane-transporting ATPase activity | Molybdate ion transport             |
| 14 | B1MLN1 | Probable sugar ABC transporter, sugar-binding protein LpqY     | MAB_1372  | lpqY | Transporter activity                                 | Transport                           |
| 15 | B1MGZ1 | Putative ABC transporter solute binding protein                | MAB_0577c | -    | Transporter activity                                 | Transport                           |
| 16 | B1MBC2 | Putative sulfonate ABC transporter, periplasmic protein        | MAB_2462  | -    | Transporter activity                                 | Sulfur metabolic process            |
| 17 | B1MGZ0 | Putative ABC transporter, ATP-binding protein                  | MAB_0576c |      | ATPase activity                                      | Transport                           |
| 18 | B1MIT8 | Putative amino acid ABC transporter, substrate-binding protein | MAB_4236c | -    | Transporter activity                                 | Transport                           |
| 19 | B1MD08 | Putative glutamate ABC transporter, periplasmic protein        | MAB_3051  | -    | Transporter activity                                 | Transport                           |
| 20 | B1MJV4 | Putative ABC transporter, periplasmic substrate-binding        | MAB_4390  | -    | ATPase activity                                      | Transport                           |
| 21 | B1MH02 | Porphyromonas-type peptidyl-arginine deiminase                 | MAB_0588c | -    | Hydrolase                                            | Nitrogen compound metabolic process |
| 22 | B1MBK6 | Probable amidohydrolase                                        | MAB_2546  | -    | Hydrolysis                                           | Metabolism                          |
| 23 | B1MG92 | Probable cutinase cut2 precursor                               | MAB_3763  | cut2 | Hydrolase esterase                                   | Metabolic process                   |
| 24 | B1MG94 | Probable cutinase cut3 precursor                               | MAB_3765  | cut3 | Cutinase activity                                    | Metabolic process                   |
| 25 | B1MG95 | Probable cutinase cut3                                         | MaB_3766  | Cut3 | Hydrolase activity                                   | Metabolic process                   |
| 26 | B1MG78 | Putative phosphodiesterase/alkaline phosphatase                | MAB_3749  | -    | Phosphatase activity                                 | Metabolic process                   |
| 27 | B1MC13 | Beta-lactamase precursor (Penicillinase)                       | MAB_2875  | blaC | Hydrolase                                            | Antibiotic resistance               |
| 28 | B1MBQ0 | Putative polysaccharide deacetylase                            | MAB_2590  | -    | Hydrolase                                            | Carbohydrate metabolic process      |
| 29 | B1MDW2 | Putative secreted hydrolase                                    | MAB_3355  | -    | Hydrolase                                            | Carbohydrate metabolic process      |
| 30 | B1MH82 | Putative triacylglycerol lipase precursor                      | MAB_3889  | -    | Hydrolase                                            | Lipid degradation                   |
| 31 | B1MHZ7 | Putative triacylglycerol lipase precursor                      | MAB_0723c | -    | Hydrolase                                            | Lipid degradation                   |
| 32 | B1MK31 | Sulfatase family protein                                       | MAB_4469c | -    | Sulfuric ester hydrolase activity                    | Metabolic process                   |
| 33 | B1MKF7 | Conserved hypothetical protein                                 | MAB_1161c | -    | Peroxidase activity                                  | Hypothetical                        |



Table S2: Identification of secretory proteins in the mid-log-phase culture of *M. abscessus* with 2D-GE proteomics.

| Spot ID # | Protein ID # | Protein Name                        | Locus Name | Score | Coverage | Proteins | Unique peptides | Peptides | PSMs | AAs | MW [KDa] | Calc. PI |
|-----------|--------------|-------------------------------------|------------|-------|----------|----------|-----------------|----------|------|-----|----------|----------|
| ML4       | B1MCR7       | Uncharacterized protein             | MAB_2960   | 14.67 | 9.53     | 1        | 5               | 5        | 5    | 682 | 73.5     | 5.03     |
| ML5       | B1MIY6       | Uncharacterized protein             | MAB_4284c  | 19.52 | 6.55     | 1        | 3               | 3        | 5    | 687 | 62.9     | 5.01     |
| ML6       | B1MIY6       | Uncharacterized protein             | MAB_4284c  | 25.59 | 9.17     | 1        | 4               | 4        | 7    | 687 | 62.8     | 5.008    |
| ML7       | B1MIY6       | Uncharacterized protein             | MAB_4284c  | 34.92 | 9.17     | 1        | 4               | 4        | 9    | 687 | 62.9     | 5.01     |
| ML10      | B1MMK7       | Uncharacterized protein             | MAB_4924   | 20.1  | 14.02    | 1        | 4               | 4        | 7    | 321 | 32       | 5.02     |
| ML11      | B1MKW1       | Uncharacterized protein             | MAB_4537c  | 4.38  | 4.5      | 1        | 2               | 2        | 2    | 333 | 35.7     | 5.88     |
| ML13      | B1MEL1       | Antigen 85-C                        | MAB_0175   | 44.88 | 16.98    | 1        | 4               | 5        | 12   | 324 | 34.7     | 6.8      |
| ML13      | B1MEL2       | Antigen 85-A                        | MAB_0176   | 17.79 | 10.21    | 1        | 2               | 3        | 6    | 333 | 35.8     | 6.57     |
| ML13      | B1MEL3       | Antigen 85-A/B/C                    | MAB_0177   | 10.37 | 5.85     | 1        | 2               | 2        | 3    | 325 | 34.9     | 6.13     |
| ML13      | B1MDF1       | Elongation factor Ts                | MAB_3195c  | 10.77 | 8.66     | 1        | 2               | 2        | 3    | 277 | 29.1     | 5.08     |
| ML13      | B1MDV5       | uncharacterized protein             | MAB_3348   | 6.96  | 10.10    | 1        | 2               | 2        | 2    | 287 | 29.5     | 6.34     |
| ML14      | B1MEL2       | Antigen 85-A                        | MAB_0176   | 36.52 | 16.22    | 1        | 3               | 5        | 12   | 333 | 35.8     | 6.57     |
| ML14      | B1MEL1       | Antigen 85-C                        | MAB_0175   | 17.34 | 8.02     | 1        | 2               | 3        | 5    | 324 | 34.7     | 6.8      |
| ML14      | B1MEL3       | Antigen 85-A//B/C                   | MAB_0177   | 14.31 | 12       | 1        | 2               | 3        | 4    | 325 | 34.9     | 6.13     |
| ML15      | B1MNL7       | Immunogenic protein MPT64           | MAB_1835c  | 15.96 | 14.55    | 1        | 4               | 4        | 6    | 275 | 29.4     | 6.19     |
| ML16      | B1MEL2       | Antigen 85-A                        | MAB_0176   | 21.59 | 12.91    | 1        | 4               | 4        | 7    | 333 | 35.8     | 6.57     |
| ML16      | B1MEL3       | Antigen 85-A//B/C                   | MAB_0177   | 8.41  | 8.62     | 1        | 3               | 3        | 3    | 325 | 34.9     | 6.13     |
| ML17      | B1MDW2       | Putative secreted hydrolase         | MAB_3355   | 14.2  | 12.59    | 1        | 2               | 2        | 4    | 286 | 28.9     | 6.3      |
| ML18      | B1MMY7       | Uncharacterized protein             | MAB_1614   | 29.25 | 19.25    | 1        | 4               | 4        | 8    | 213 | 22.3     | 4.88     |
| ML19      | B1MMY7       | Uncharacterized protein             | MAB_1614   | 14.6  | 15.96    | 1        | 2               | 2        | 3    | 213 | 22.3     | 4.88     |
| ML20      | B1MFV4       | Uncharacterized protein             | MAB_0405c  | 22.72 | 13.33    | 1        | 3               | 3        | 8    | 195 | 20.2     | 5.99     |
| ML21      | B1MBL9       | Peptidyl-prolyl cis-trans isomerase | MAB_2559c  | 19    | 17.86    | 1        | 2               | 2        | 5    | 196 | 19.1     | 5.06     |
| ML22      | B1MCH9       | Uncharacterized protein             | MAB_2871c  | 48.17 | 22.86    | 1        | 4               | 4        | 15   | 140 | 14.8     | 5.12     |
| ML23      | B1MIR3       | Uncharacterized protein             | MAB_4211c  | 9.37  | 22.9     | 1        | 2               | 2        | 3    | 131 | 14       | 5.14     |
| ML25      | B1MBM0       | Uncharacterized protein             | MAB_2560   | 30.97 | 27.36    | 1        | 4               | 4        | 9    | 201 | 20.5     | 5.88     |

|             |        |                                |          |       |       |   |   |   |   |     |      |      |
|-------------|--------|--------------------------------|----------|-------|-------|---|---|---|---|-----|------|------|
| <b>ML27</b> | B1MNM5 | D-alanyl-D-alanine dipeptidase | MAB_1843 | 17.51 | 19.37 | 1 | 3 | 3 | 5 | 222 | 23.8 | 6.92 |
| <b>ML27</b> | B1MBM0 | Uncharacterized protein        | MAB_2560 | 17.1  | 21.89 | 1 | 3 | 3 | 5 | 201 | 20.5 | 5.88 |
| <b>ML28</b> | B1MFV1 | Uncharacterized protein        | MAB_0402 | 18.92 | 16.24 | 1 | 3 | 3 | 6 | 234 | 25.2 | 6.71 |

Table S3: Identification of secretory proteins in the late-log-phase culture of *M. abscessus* with 2D-GE proteomics.

| Spot ID # | Protein ID # | Protein Name                          | Locus Name | Score | Coverage | Proteins | Unique peptides | Peptides | PSMs | AAs | MW [KDa] | Calc. PI |
|-----------|--------------|---------------------------------------|------------|-------|----------|----------|-----------------|----------|------|-----|----------|----------|
| LL3       | B1MJB0       | Uncharacterized protein               | MAB_0974   | 9.39  | 8.09     | 1        | 3               | 3        | 3    | 606 | 61.2     | 5.39     |
| LL4       | B1MCR7       | Uncharacterized protein               | MAB_2960   | 8.2   | 2.49     | 1        | 2               | 2        | 3    | 682 | 73.5     | 5.03     |
| LL5       | B1MJB0       | Uncharacterized protein               | MAB_0974   | 12.93 | 7.1      | 1        | 3               | 3        | 4    | 606 | 61.2     | 5.39     |
| LL5       | B1MCR7       | Uncharacterized protein               | MAB_2960   | 8.12  | 2.49     | 1        | 2               | 2        | 4    | 682 | 73.5     | 5.03     |
| LL6       | B1MIY6       | Uncharacterized protein               | MAB_4284c  | 22.85 | 6.11     | 1        | 3               | 3        | 7    | 687 | 62.9     | 5.01     |
| LL7       | B1MIY6       | Uncharacterized protein               | MAB_4284c  | 15.3  | 3.49     | 1        | 2               | 2        | 4    | 687 | 62.9     | 5.01     |
| LL8       | B1MIY6       | Uncharacterized protein               | MAB_4284c  | 36.53 | 9.17     | 1        | 4               | 4        | 9    | 687 | 62.9     | 5.01     |
| LL9       | B1MIY6       | Uncharacterized protein               | MAB_4284c  | 15.73 | 7.57     | 1        | 3               | 3        | 4    | 687 | 62.9     | 5.01     |
| LL11      | B1MIY6       | Uncharacterized protein               | MAB_4284c  | 25.53 | 9.17     | 1        | 4               | 4        | 7    | 687 | 62.9     | 5.01     |
| LL12      | B1MB96       | Uncharacterized protein               | MAB_2436   | 24.95 | 11.63    | 1        | 4               | 4        | 8    | 344 | 34.8     | 6.06     |
| LL12      | B1MJN7       | Aldehyde dehydrogenase family protein | MAB_4322   | 5.3   | 4.92     | 1        | 2               | 2        | 2    | 447 | 47.2     | 4.82     |
| LL13      | B1MMK7       | Uncharacterized protein               | MAB_4924   | 28.85 | 23.05    | 1        | 5               | 5        | 9    | 321 | 32       | 5.02     |
| LL14      | B1MMK7       | Uncharacterized protein               | MAB_4924   | 36.53 | 24.92    | 1        | 5               | 5        | 12   | 321 | 32       | 5.02     |
| LL16      | B1MKW1       | Uncharacterized protein               | MAB_4537c  | 18.73 | 13.81    | 1        | 3               | 3        | 6    | 333 | 35.7     | 5.88     |
| LL17      | B1MEL1       | Antigen 85-C                          | MAB_0175   | 29.86 | 13.27    | 1        | 3               | 4        | 8    | 324 | 34.7     | 6.8      |
| LL17      | B1MDF1       | Elongation factor Ts                  | tsf        | 22.48 | 18.05    | 1        | 4               | 4        | 6    | 277 | 29.1     | 5.08     |
| LL17      | B1MEL2       | Antigen 85-A                          | MAB_0176   | 19.25 | 10.21    | 1        | 2               | 3        | 6    | 333 | 35.8     | 6.57     |
| LL18      | B1MEL2       | Antigen 85-A                          | MAB_0176   | 41.42 | 16.22    | 1        | 4               | 5        | 14   | 333 | 35.8     | 6.57     |
| LL18      | B1MEL3       | Antigen 85-A/B/C                      | MAB_0177   | 20.45 | 12       | 1        | 2               | 3        | 7    | 325 | 34.9     | 6.13     |

|      |        |                                                 |           |       |       |   |   |   |    |     |      |      |
|------|--------|-------------------------------------------------|-----------|-------|-------|---|---|---|----|-----|------|------|
| LL18 | B1MDV5 | Uncharacterized protein                         | MAB_3348  | 17.62 | 10.1  | 1 | 2 | 2 | 5  | 287 | 29.5 | 6.34 |
| LL19 | B1MEL2 | Antigen 85-A                                    | MAB_0176  | 62.34 | 18.92 | 1 | 4 | 6 | 19 | 333 | 35.8 | 6.57 |
| LL19 | B1MEL3 | Antigen 85-A/B/C                                | MAB_0177  | 40.29 | 12    | 1 | 2 | 3 | 11 | 325 | 34.9 | 6.13 |
| LL19 | B1MEL1 | Antigen 85-C                                    | MAB_0175  | 32.15 | 16.98 | 1 | 4 | 5 | 9  | 324 | 34.7 | 6.8  |
| LL19 | B1MEC9 | Uncharacterized protein                         | MAB_0093  | 13.39 | 8.85  | 1 | 2 | 2 | 4  | 260 | 28.4 | 5.34 |
| LL19 | B1MDV5 | Uncharacterized protein                         | MAB_3348  | 11.23 | 10.1  | 1 | 2 | 2 | 3  | 287 | 29.5 | 6.34 |
| LL20 | B1MEL1 | Antigen 85-C                                    | MAB_0175  | 19.15 | 11.42 | 1 | 3 | 3 | 5  | 324 | 34.7 | 6.8  |
| LL21 | B1MNL7 | Immunogenic protein MPT64                       | MAB_1835c | 38.19 | 28.73 | 1 | 6 | 6 | 12 | 275 | 29.4 | 6.19 |
| LL22 | B1MDW2 | Putative secreted hydrolase                     | MAB_3355  | 20.54 | 22.03 | 1 | 4 | 4 | 6  | 286 | 28.9 | 6.3  |
| LL23 | B1MMY7 | Uncharacterized protein                         | MAB_1614  | 36.11 | 15.96 | 1 | 3 | 3 | 8  | 213 | 22.3 | 4.88 |
| LL24 | B1MMY7 | Uncharacterized protein                         | MAB_1614  | 20.67 | 15.96 | 1 | 3 | 3 | 5  | 213 | 22.3 | 4.88 |
| LL25 | B1MBM0 | Uncharacterized protein                         | MAB_2560  | 25.26 | 27.36 | 1 | 4 | 4 | 7  | 201 | 20.5 | 5.88 |
| LL25 | B1MG92 | Cutinase                                        | MAB_3763  | 13.46 | 10.96 | 1 | 2 | 2 | 4  | 228 | 23.5 | 6.3  |
| LL26 | B1MBM0 | Uncharacterized protein                         | MAB_2560  | 13.87 | 13.43 | 1 | 2 | 2 | 4  | 201 | 20.5 | 5.88 |
| LL27 | B1MBM0 | Uncharacterized protein                         | MAB_2560  | 67.28 | 37.81 | 1 | 6 | 6 | 18 | 201 | 20.5 | 5.88 |
| LL28 | B1MBD4 | Uncharacterized protein                         | MAB_2474  | 14.46 | 10.87 | 1 | 3 | 3 | 4  | 184 | 19.1 | 8.41 |
| LL29 | B1MFV4 | Uncharacterized protein                         | MAB_0405c | 12.74 | 12.82 | 1 | 2 | 2 | 4  | 195 | 20.2 | 5.99 |
| LL29 | B1MDB0 | Uncharacterized protein                         | MAB_3154c | 6.6   | 11.79 | 1 | 2 | 2 | 2  | 212 | 21.7 | 5.06 |
| LL30 | B1MBL9 | Peptidyl-prolyl cis-trans isomerase             | MAB_2559c | 13.19 | 17.86 | 1 | 2 | 2 | 4  | 196 | 19.1 | 5.06 |
| LL30 | B1MFV4 | Uncharacterized protein                         | MAB_0405c | 11.75 | 13.33 | 1 | 3 | 3 | 4  | 195 | 20.2 | 5.99 |
| LL31 | B1MGD1 | Uncharacterized protein                         | MAB_3801c | 19.76 | 25.7  | 1 | 3 | 3 | 6  | 179 | 18.5 | 6    |
| LL32 | B1MGD1 | Uncharacterized protein                         | MAB_3801c | 6.1   | 15.08 | 1 | 2 | 2 | 2  | 179 | 18.5 | 6    |
| LL36 | B1MCH9 | Uncharacterized protein                         | MAB_2871c | 60.59 | 22.86 | 1 | 4 | 4 | 17 | 140 | 14.8 | 5.12 |
| LL38 | B1MDK0 | Soluble secreted antigen MPT53                  | MAB_3243  | 5.93  | 11.8  | 1 | 2 | 2 | 2  | 178 | 19.1 | 9.57 |
| LL39 | B1MAH1 | Hypothetical low-molecular-weight antigen Mtb12 | MAB_2161c | 26.23 | 27.43 | 1 | 3 | 3 | 7  | 175 | 17.3 | 4.81 |

|             |        |                                |           |       |       |   |   |   |    |     |      |      |
|-------------|--------|--------------------------------|-----------|-------|-------|---|---|---|----|-----|------|------|
| <b>LL39</b> | B1MDK6 | Uncharacterized protein        | MAB_3249  | 10.43 | 13.61 | 1 | 2 | 2 | 4  | 147 | 16.2 | 6.58 |
| <b>LL39</b> | B1MIH2 | Probable aldo/keto reductase   | MAB_4120c | 3.39  | 4.26  | 1 | 2 | 2 | 2  | 329 | 35.3 | 5.11 |
| <b>LL42</b> | B1MNM5 | D-alanyl-D-alanine dipeptidase | MAB_1843  | 41.05 | 35.59 | 1 | 6 | 6 | 11 | 222 | 23.8 | 6.92 |
| <b>LL45</b> | B1MCS9 | Uncharacterized protein        | MAB_2972  | 25.05 | 24.39 | 1 | 3 | 3 | 7  | 164 | 17.6 | 7.06 |
| <b>LL47</b> | B1MMY9 | Uncharacterized protein        | MAB_1616  | 14.89 | 19.44 | 1 | 3 | 3 | 5  | 180 | 20.3 | 7.97 |

**Table S4: N-terminal signal sequences and probable cleavage sites in the secretory proteins of *M. abscessus* predicted with the in silico analysis of the secreted proteins identified with 2D- GE proteomics.**

| Serial # | Protein ID | Protein Name                        | Signal peptide sequence                          | Cleavage position |
|----------|------------|-------------------------------------|--------------------------------------------------|-------------------|
| 1        | B1MCR7     | Uncharacterized protein             | Non-classically secreted protein that lacks SP   | -                 |
| 2        | B1MIY6     | Uncharacterized protein             | Non-classically secreted protein that lacks SP   | -                 |
| 3        | B1MMK7     | Uncharacterized protein             | MTTTRYSVRF <del>AA</del> ATASVAALLAGTAAVAMA-DPQP | 30                |
| 4        | B1MEL2     | Antigen 85-A                        | MKLFSKMRGALARQSARRI <del>AV</del> A-ATAV         | 22                |
| 5        | B1MEL1     | Antigen 85-C                        | MSVRVKARRVLSALLA <del>AF</del> VMPSMAAA-MTIN     | 27                |
| 6        | B1MEL3     | Antigen 85-A//B/C                   | MKLFSQLRGKTARRLATVAAA-AAVL                       | 21                |
| 7        | B1MNL7     | Immunogenic protein MPT64           | MPYLSLR <del>SIS</del> ASVLVTAASIFGFSGVAGA-APHD  | 29                |
| 8        | B1MDW2     | Putative secreted hydrolase         | MRALRTLSTMIGLAAVVAATAAVPPIASA-EPAA               | 29                |
| 9        | B1MMY7     | Uncharacterized protein             | MTGRITGIVSALVGAVALVLGLFGSMAVATA-SPDT             | 31                |
| 10       | B1MFV4     | Uncharacterized protein             | MKKRLVSAGVIALAAALSGPAALA-AAAP                    | 24                |
| 11       | B1MBL9     | Peptidyl-prolyl cis-trans isomerase | MNLFRVSPSATLAACTASFVMALAACGSDTEANSAPA-DPPS       | 37                |
| 12       | B1MCH9     | Uncharacterized protein             | MTGMGRITAALLATASTATLTLALAPAAEA-APHQ              | 30                |
| 13       | B1MIR3     | Uncharacterized protein             | MLVTLASGVVIGAAAAPMTA-ADPG                        | 20                |

|    |        |                                                 |                                                       |    |
|----|--------|-------------------------------------------------|-------------------------------------------------------|----|
| 14 | B1MBM0 | Uncharacterized protein                         | MRTIAIRHRAVIGLSAVALITVGCSNG-TSVD                      | 27 |
| 15 | B1MNM5 | D-alanyl-D-alanine dipeptidase                  | MMKRLILGFGYAALGIGCALGQVAPASA-DPDI                     | 28 |
| 16 | B1MFV1 | Uncharacterized protein                         | Non-classically secreted protein that lacks SP        | -  |
| 17 | B1MJB0 | Uncharacterized protein                         | MHVGIRTVAVAAVCGLCVGAGVDARA-VRPN                       | 26 |
| 18 | B1MB96 | Uncharacterized protein                         | MQQPRATSAAKRTHRARVIAATIAVTSLSGAGA-YTLA                | 33 |
| 19 | B1MJN7 | Aldehyde dehydrogenase family protein           | Not predictable as secretory protein                  | -  |
| 20 | B1MKW1 | Uncharacterized protein                         | MLVLTRWFRRALVSGVCVAGLLGAGVVPALA-DPGD                  | 31 |
| 21 | B1MDF1 | Elongation factor Ts                            | Not predictable as secretory protein                  | -  |
| 22 | B1MDV5 | Uncharacterized protein                         | MTSVGDKGRRRTGPWGRLTAYAAAVAALSGIGLANPI<br>AAHA-DPLI    | 40 |
| 23 | B1MEC9 | Uncharacterized protein                         | MRIAASVLAAALCGWAGTAPVVRA-EPSS                         | 24 |
| 24 | B1MG92 | Cutinase                                        | MTLQPNPRPASKLLTAAARAAVVSVAAIMLTTGLAV<br>VIPATASA-ACPN | 44 |
| 25 | B1MBD4 | Uncharacterized protein                         | MKSTYAVLLGIALLLVTPGLASA-DVPR                          | 23 |
| 26 | B1MDB0 | Uncharacterized protein                         | MIARLITTTGLLMAALGLTEAAAAIA-EPID                       | 25 |
| 27 | B1MGD1 | Uncharacterized protein                         | MDTPMQVSQGRRGISKARVRATGVAALTALALVALPGVA<br>GA-DPEV    | 41 |
| 28 | B1MDK0 | Soluble secreted antigen MPT53                  | MNIQFGGRKKFRAQQVRGLTRTVAVVVAVLLVSAGLVRAP<br>SARA-DGLL | 44 |
| 29 | B1MAH1 | Hypothetical low-molecular-weight antigen Mtb12 | MTGVAMLGLLAAVAVGSAVPTGEPTASS-ASPT                     | 28 |
| 30 | B1MDK6 | Uncharacterized protein                         | MTSRPQCYVIAAITAAATFCASFFWAQTAAA-EPIV                  | 31 |
| 31 | B1MIH2 | Probable aldo/keto reductase                    | Not predictable as secretory protein                  | -  |
| 32 | B1MCS9 | Uncharacterized protein                         | MRLRPALSLIAALTAVITALAPTASA-LPDR                       | 26 |
| 33 | B1MMY9 | Uncharacterized protein                         | MKRMLAATALTAALTALGTPAVHA-APNR                         | 24 |

Potential cleavage sites are indicated by hyphens in amino acid sequences.



**Table S5: N-terminal signal sequences and probable cleavage sites in the secreted proteins of *M. abscessus* predicted in silico.**

| Gene ID   | Signal sequences                                  | Amino acid residues |
|-----------|---------------------------------------------------|---------------------|
| MAB_0046  | MNLNVVPEGLTATSAAVEALTARLAAAHAAA-APVI              | 31                  |
| MAB_0063c | MKFSHHLTRRTAGAACVLGAAAVITAPAASA-APDC              | 31                  |
| MAB_0093  | MRIAASVLAAALCGWAGTAPVVRA-EPSS                     | 24                  |
| MAB_0168c | MRVSKMPVRRQLALAVAATATVMTVSVVDHIKSGQ-AEETA         | 35                  |
| MAB_0169c | MPNRRRRRLSTALSSVAALAVASPFALATNMTQAA-APAP          | 37                  |
| MAB_0353  | MRTARTVLTSVAAAFLGTATPAAGA-VPSD                    | 26                  |
| MAB_0360  | MRSVMGALSVALGVMTPATATA-DPSS                       | 22                  |
| MAB_036   | MDINGVSAIVTGGASGLGAATARLLAAQGAKVVIA-DVQD          | 35                  |
| MAB_0424  | MRYGLPVLIALFGLFAAAIPAAA-APAA                      | 23                  |
| MAB_0463c | MAVSRSQWGRRGFLQLGAATAAGVLA-ACGT                   | 27                  |
| MAB_0521  | MTEVAVALSGGADSLALAAAVARA-WSVT                     | 25                  |
| MAB_0555  | MSPLTRRRLLTSAAGTAAFSAAVSLMPANLQRVLAQP-APRS        | 37                  |
| MAB_0560  | MSRDTGRRRPKHALPKSNKRWSVSKTAAA-RTIF                | 29                  |
| MAB_0565c | MKRTLAAATAATAVMSLVLPATAQA-APPK                    | 25                  |
| MAB_0576c | MSAATLRDASLNRGGRTLWQGLDLTVEPGEFIAVLGPNGSGK-TSLL   | 46                  |
| MAB_0588c | MHRRHLFKLGAATAGAVMLTACA-DPPD                      | 23                  |
| MAB_0620c | MTRWTGLMVAAITLTGGIAASTAVAPNVACA-CSCV              | 32                  |
| MAB_0684c | MRDLSRRSLLKLGAATGAGAALLGAGAFPAGA-DGAI             | 32                  |
| MAB_0723c | MPTASHRARGALRDPAPQHPRAGKLRIILLATALVASLVTTEGA-PTTL | 43                  |
| MAB_0734  | MAGTFIRCIRSACFAAVVVGVAVLQAPPVFA-EPVT              | 31                  |
| MAB_0743c | MRKPLIATIAAVCALALAATGTDFGFA-IFAE                  | 27                  |
| MAB_0848c | MLRRLCTATATLALAAAAYPPVAQA-EPEQ                    | 25                  |
| MAB_0869c | MSGRHSPSKASAKAAKVAVAGAGLVGGGLMMAATANA-ATDG        | 38                  |
| MAB_0884c | MKRVWAAVVGGAMLAATQSSCA-ASTQ                       | 22                  |
| MAB_0957  | MCAALGVGLLSGGAAVAHA-DPAF                          | 19                  |
| MAB_1003c | MRISKLFAGRVARGVAGTVVAAAMAGTALVGAPLAGA-SAQS        | 37                  |
| MAB_1026c | MKINVPITAAVAAAAAAGLALMPTAGA-DTTL                  | 28                  |
| MAB_1042c | MYLVTCFAFFMVGGLMALLIRA-ELTT                       | 22                  |
| MAB_1161c | MSTGLNRRKLLGAAGVTAAVAGAAGAGVLGGRASA-ASTG          | 35                  |
| MAB_1164  | MSSVAVRSLPARFGRIMLVVSISVFLLA-AGCS                 | 28                  |
| MAB_1193c | MSILATRRRTIWAALSTGAAGA-AMGT                       | 22                  |
| MAB_1261  | MTKSGYFATALDAMVVVLPVAAVALA-AVAH                   | 26                  |
| MAB_1271c | MNTGMSPRLDRRELLRLGMTAAAAGFLASCTKNTSGA-ATSP        | 37                  |
| MAB_1322  | MNKFLCATAVLLSMAGWAPAAAA-EPGN                      | 23                  |
| MAB_1323  | MATVVMGLAVGLAVPATA-APPP                           | 18                  |
| MAB_1363  | MVDSGSFRRASFSSFSRLPSPFA-SQSG                      | 25                  |
| MAB_1372  | MLESSARWFRKGVGVALGSSLLTCLTLASLTGCA-RSDD           | 33                  |
| MAB_1543  | MKGLSLTAMIAMGAGAAIAMASPAYA-DDVS                   | 27                  |
| MAB_1553c | MDKLRTRVVIGIAAVGMSVGSFSAAGIAQA-NDHT               | 30                  |
| MAB_1616  | MKRMLAATALTAALTALGTPAVHA-APNR                     | 24                  |
| MAB_1843  | MMKRLILGFGYAALGIGCALGQVAPASA-DPDI                 | 28                  |
| MAB_1974  | MSVGRLLRNHSDRLTPSPLRRAMLAVTAAALVGGVFTGAQTATA-DPNN | 44                  |
| MAB_2000  | MNRQDRSRPVGARRTRPAAAVSRTAGFA-FRHR                 | 29                  |
| MAB_2113  | MITNFRRFSAAGILAASAVALAAPAHA-DGEV                  | 27                  |

|           |                                                      |    |
|-----------|------------------------------------------------------|----|
| MAB_2329c | MAVRKRVGAVMALVTAICTFATAPAHA-DPVA                     | 27 |
| MAB_2456  | MDPQSRPALMTRRTVLSAGAMLALG-STSL                       | 25 |
| MAB_2462  | MNGRAPRRAVLTGAAGIAATAGLFGATGLVRA-AMFD                | 32 |
| MAB_2546  | MCTACEWAPHFAALSAKSTRRTALRAAVALTLAAGAAA-CSAG          | 38 |
| MAB_2590  | MFDRRRFLTLLAGAAAAGASFIEYVSA-AADP                     | 27 |
| MAB_2594  | MVPISRRDVLKYAAAI PAAALAGAVSAAAPRANA-ASLG             | 34 |
| MAB_1511  | MVPISRRDVLKYAAAI PAAALAGAVSAAAPRANA-ASLG             | 34 |
| MAB_2697c | MILGAAVVVATLSGCASSGGQQDAEA-SIAV                      | 26 |
| MAB_2699c | MTSRSLPVPDGLSGMRVDAGLARLLGLSRTAAA-ALAE               | 30 |
| MAB_2750c | MKFGPGTSAGTAATAAPSLNAAPA-ASTE                        | 24 |
| MAB_2787c | MFGGAPQTAGLFGPRRSASLVVALA-AFLA                       | 25 |
| MAB_2798c | MRLLNIRRYLAVPAVTAFa-AGLA                             | 19 |
| MAB_2799  | MLKSLVSLTTVCALALTAPLAFA-DPED                         | 23 |
| MAB_2800  | MNDTHSNSSHLSTRGATPMLKSLAAATAVCALAVTAPFALA-DPGD       | 41 |
| MAB_2805c | MSAVAAGVGLVASPALSADPAAET-APKI                        | 26 |
| MAB_2871c | MTGMGRITAALLATASTATLTLALAPAAEA-APHQ                  | 30 |
| MAB_2875  | MISRRALLVGVSAGVVAAGCSRNGNRRPA-PDEL                   | 31 |
| MAB_2878c | MDSRSPARTGARRIARIGAIVTTVLLAAGLLTSCWTSAA-KTLD         | 39 |
| MAB_3031c | MTASRLVATMVVAGCCAAIAPA-CTRA                          | 22 |
| MAB_3051  | MSRLRDEDARVMRRRHTALVAALALLATLVSA-CGST                | 32 |
| MAB_3154c | MIARLITTGLLMAALGLTEAAAAIA-EPID                       | 25 |
| MAB_3165c | MLVVTGLVSLLMNAAVTAPATLGHALA-ASPS                     | 27 |
| MAB_3215c | MTVPVVVVALPMGSPGATVSG-SPVH                           | 21 |
| MAB_3264c | MVAVASGAVSLAAAGVALA-DDGD                             | 19 |
| MAB_3305c | MAVMISRRGWLVASAVALSGQAIPA-CSAP                       | 25 |
| MAB_3348  | MTSVGDKGRRTGPWGRLTAYAAVAALSGIGLANPIAHA-DPLI          | 40 |
| MAB_3355  | MRALRTLSTMIGLAAVVAATAAVPPIASA-EPAA                   | 29 |
| MAB_3390  | MQTARLWGAAAI SAALVTATVSG-CTEK                        | 23 |
| MAB_3454  | MSTRRRISVVLMTSAVIGSSVAVDVAPVAYA-DPCA                 | 31 |
| MAB_3472  | MRMLLITCVAVAAGATTTFAGQAAA-DPPP                       | 24 |
| MAB_3493  | MALTATLMTACTAAVGATAFG-ASLA                           | 21 |
| MAB_3532  | MIAPERTRADI IAAAVIAVVAVTGTTIWWTSDARA-TVSR            | 37 |
| MAB_3681  | MTTWT PAPDRRPSRTAVTRLAAATAAGLIVAVLPLCAPPLASA-EPGF 44 |    |
| MAB_3749  | MTAFPRRTVLRAALLGLAAVPVAA-CGPA                        | 24 |
| MAB_3763  | MTLQPNPRPASKLLTAAARA VVSVAAIMLTTGLAVVIPATASA-ACPN    | 44 |
| MAB_3765  | MTTHSAVL PATSYVRRPGYLLAALLMFASLVAMSQVPVAAA-DPCA      | 41 |
| MAB_3889  | MIKRGLALAAVTALT VAGLNSSQVVA-GYGD                     | 26 |
| MAB_3910  | MSDPAPRGPKRPSVISPMVLAPAGTTEA-KALA                    | 28 |
| MAB_3950c | MDATMIILVLLIATALA-FDFT                               | 17 |
| MAB_4037  | MSHRLRGLRAGIAATALLASAQVIHPVATARA-ALPP                | 32 |
| MAB_4061c | MKYPRPHLGDALTRRRALTILGLTVPAVAAA-CTTV                 | 31 |
| MAB_4062c | MRI AIVTLVMWLGLTAAPPATA-DPGP                         | 22 |
| MAB_4185c | MNERVPDSHGLPLRAMVMVLLFLGVIFLLVGFNALG-SDKS            | 36 |
| MAB_4192  | MRRGHV I IAMQTIACLLLLAGSAYL-YTIV                     | 25 |
| MAB_4211c | MLVTLASGVVIGAAAAPMTA-ADPG                            | 20 |
| MAB_4212c | MALFSARGLARGCSLLAIAAVASCCAHPSTPGA-AAPT               | 33 |
| MAB_4236c | MRFLT VLVCTALT VLAGCAEGA-APGS                        | 22 |
| MAB_4280c | MRGWLRTISALVVIAGLGAAVPAAA-EPKS                       | 25 |

|           |                                                   |    |
|-----------|---------------------------------------------------|----|
| MAB_4281c | MMMLRFVATLALVAGFSTATATAAA-EPTP                    | 23 |
| MAB_4390  | MPPGMITRRGLLAAGAALAASTALA-SCAK                    | 25 |
| MAB_4469c | MAELNRRTVLTTGAIAAGA-AAVG                          | 19 |
| MAB_4576c | MRGLLGAFVAGAALLTPVATA-EPHD                        | 21 |
| MAB_4782  | MHHSSAPGRHSGSSLVSRRDALRYVLTAPLLAGLPVFAAPQAAA-DGLR | 44 |
| MAB_4852c | MKLNRFGAVLTLVASGALVLSACGSDNNASG-SSGS              | 31 |
| MAB_4903  | MTSRRLSTALAGFAIITGAAA-GCGT                        | 21 |
| MAB_4914c | MRGAPVILLSVTVLLSSCTQAIA-GDAT                      | 23 |
| MAB_4915c | MRRGMAAVCIVLSLAGCSRISGGE-PTAP                     | 24 |
| MAB_4924  | MTTTRYSVRFAAATASVAALLAGTAAVAMA-DPQP               | 30 |

Potential cleavage sites are indicated by hyphens in the amino acid sequences.
